# Supplementary material
Source: Research Square preprint supplement (doi:10.21203/rs.3.rs-9031632/v1)
Supplement: Supplementary file 1 [file a496fc5e35eee097e5b7a401.pdf]

# Polarising alone?

The relationship between social contact and affective polarisation in  
Belgium and the UK

*Supplementary material*

## *Table of contents*

|          |                                                       |           |
|----------|-------------------------------------------------------|-----------|
| <b>1</b> | <b>Data collection</b> .....                          | <b>2</b>  |
| <b>2</b> | <b>Description variables</b> .....                    | <b>3</b>  |
| 2.1      | <i>Independent: social connection variables</i> ..... | 3         |
| 2.1.1    | Descriptive tables.....                               | 3         |
| 2.1.2    | Histograms .....                                      | 4         |
| 2.2      | <i>Dependent: affective polarisation</i> .....        | 6         |
| 2.2.1    | Descriptive tables.....                               | 6         |
| 2.2.2    | Histograms .....                                      | 7         |
| 2.3      | <i>Control variables</i> .....                        | 9         |
| 2.3.1    | Operationalisation.....                               | 9         |
| 2.3.2    | Descriptives .....                                    | 10        |
| <b>3</b> | <b>Multivariate description</b> .....                 | <b>12</b> |
| 3.1      | <i>Correlation plots</i> .....                        | 12        |
| 3.1.1    | Belgium.....                                          | 12        |
| 3.1.2    | United Kingdom.....                                   | 13        |
| <b>4</b> | <b>Model information</b> .....                        | <b>14</b> |
| 4.1      | <i>Model 1 (degree of relations)</i> .....            | 14        |
| 4.1.1    | Model table (main).....                               | 14        |
| 4.1.2    | Model tables (robustness checks).....                 | 15        |
| 4.2      | <i>Model 2 (kind of relations)</i> .....              | 17        |
| 4.2.1    | Model table (main).....                               | 17        |
| 4.2.2    | Model tables (robustness checks).....                 | 18        |

# 1 Data collection

Based on the quotas provided by the marketing bureau, Kantar, the representativeness and generalizability of the samples are based on gender, age groups and regions as shown in the table below.

|                                 | Belgium                     |            | United Kingdom |            |
|---------------------------------|-----------------------------|------------|----------------|------------|
|                                 | Population <sup>1</sup> (%) | Sample (%) | Population (%) | Sample (%) |
| <b>Gender</b>                   |                             |            |                |            |
| <i>Male</i>                     | 48,8                        | 48,6       | 48,9           | 48,8       |
| <i>Female</i>                   | 51,2                        | 50,8       | 51,1           | 50,9       |
| <b>Age</b>                      |                             |            |                |            |
| <i>18-24</i>                    | 10,2                        | 10,2       | 11,0           | 11,0       |
| <i>25-34</i>                    | 16,2                        | 16,2       | 17,2           | 17,2       |
| <i>35-44</i>                    | 16,2                        | 16,0       | 16,0           | 16,0       |
| <i>45-54</i>                    | 17,3                        | 17,4       | 17,6           | 17,6       |
| <i>55-64</i>                    | 16,4                        | 16,4       | 15,1           | 15,1       |
| <i>65-74</i>                    | 13,0                        | 12,7       | 13,0           | 12,7       |
| <i>75 and more</i>              | 11,0                        | 11,1       | 10,0           | 10,4       |
| <b>Region</b>                   |                             |            |                |            |
| <i>Flanders</i>                 | 58,7                        | 59,0       |                |            |
| <i>Wallonia</i>                 | 29,1                        | 29,3       |                |            |
| <i>Brussels Capital</i>         | 12,2                        | 11,7       |                |            |
| <i>Northern England</i>         |                             |            | 24,0           | 24,0       |
| <i>Central England</i>          |                             |            | 25,0           | 25,2       |
| <i>London</i>                   |                             |            | 13,0           | 13,0       |
| <i>South England</i>            |                             |            | 22,0           | 21,8       |
| <i>Ireland, Scotland, Wales</i> |                             |            | 16,0           | 16,0       |

<sup>1</sup> Based on the population quotas provided by the marketing bureau.

## 2 Description variables

### 2.1 Independent: social connection variables

#### 2.1.1 Descriptive tables

##### 2.1.1.1 United Kingdom

###### Descriptive statistics UK

| <i>vars</i>               | <i>n</i> | <i>mean</i> | <i>sd</i> | <i>median</i> | <i>trimmed</i> | <i>mad</i> | <i>min</i> | <i>max</i> | <i>range</i> | <i>skew</i> | <i>kurtosis</i> | <i>se</i> |
|---------------------------|----------|-------------|-----------|---------------|----------------|------------|------------|------------|--------------|-------------|-----------------|-----------|
| Loneliness                | 980      | 2.32        | 1.31      | 2             | 2.19           | 1.48       | 1          | 5          | 4            | 0.44        | -1.04           | 0.04      |
| Meet network              | 1000     | 3.39        | 0.94      | 4             | 3.46           | 1.48       | 1          | 5          | 4            | -0.69       | 0.32            | 0.03      |
| Meet similar background   | 1000     | 3.12        | 1.06      | 3             | 3.20           | 1.48       | 1          | 5          | 4            | -0.50       | -0.37           | 0.03      |
| Meet different background | 1000     | 2.74        | 1.14      | 3             | 2.73           | 1.48       | 1          | 5          | 4            | -0.04       | -0.82           | 0.04      |
| Meet different views      | 1000     | 2.71        | 1.14      | 3             | 2.71           | 1.48       | 1          | 5          | 4            | -0.05       | -0.87           | 0.04      |

##### 2.1.1.2 Belgium

###### Descriptive statistics BE

| <i>vars</i>               | <i>n</i> | <i>mean</i> | <i>sd</i> | <i>median</i> | <i>trimmed</i> | <i>mad</i> | <i>min</i> | <i>max</i> | <i>range</i> | <i>skew</i> | <i>kurtosis</i> | <i>se</i> |
|---------------------------|----------|-------------|-----------|---------------|----------------|------------|------------|------------|--------------|-------------|-----------------|-----------|
| Loneliness                | 975      | 2.28        | 1.22      | 2             | 2.17           | 1.48       | 1          | 5          | 4            | 0.47        | -0.87           | 0.04      |
| Meet network              | 1000     | 3.20        | 0.97      | 3             | 3.27           | 1.48       | 1          | 5          | 4            | -0.50       | -0.14           | 0.03      |
| Meet similar background   | 1000     | 2.93        | 1.08      | 3             | 2.99           | 1.48       | 1          | 5          | 4            | -0.43       | -0.70           | 0.03      |
| Meet different background | 1000     | 2.62        | 1.13      | 3             | 2.60           | 1.48       | 1          | 5          | 4            | 0.00        | -0.88           | 0.04      |
| Meet different views      | 1000     | 2.50        | 1.18      | 3             | 2.45           | 1.48       | 1          | 5          | 4            | 0.17        | -0.97           | 0.04      |

## 2.1.2 Histograms

### 2.1.2.1 Belgium

#### Independent variables Belgium

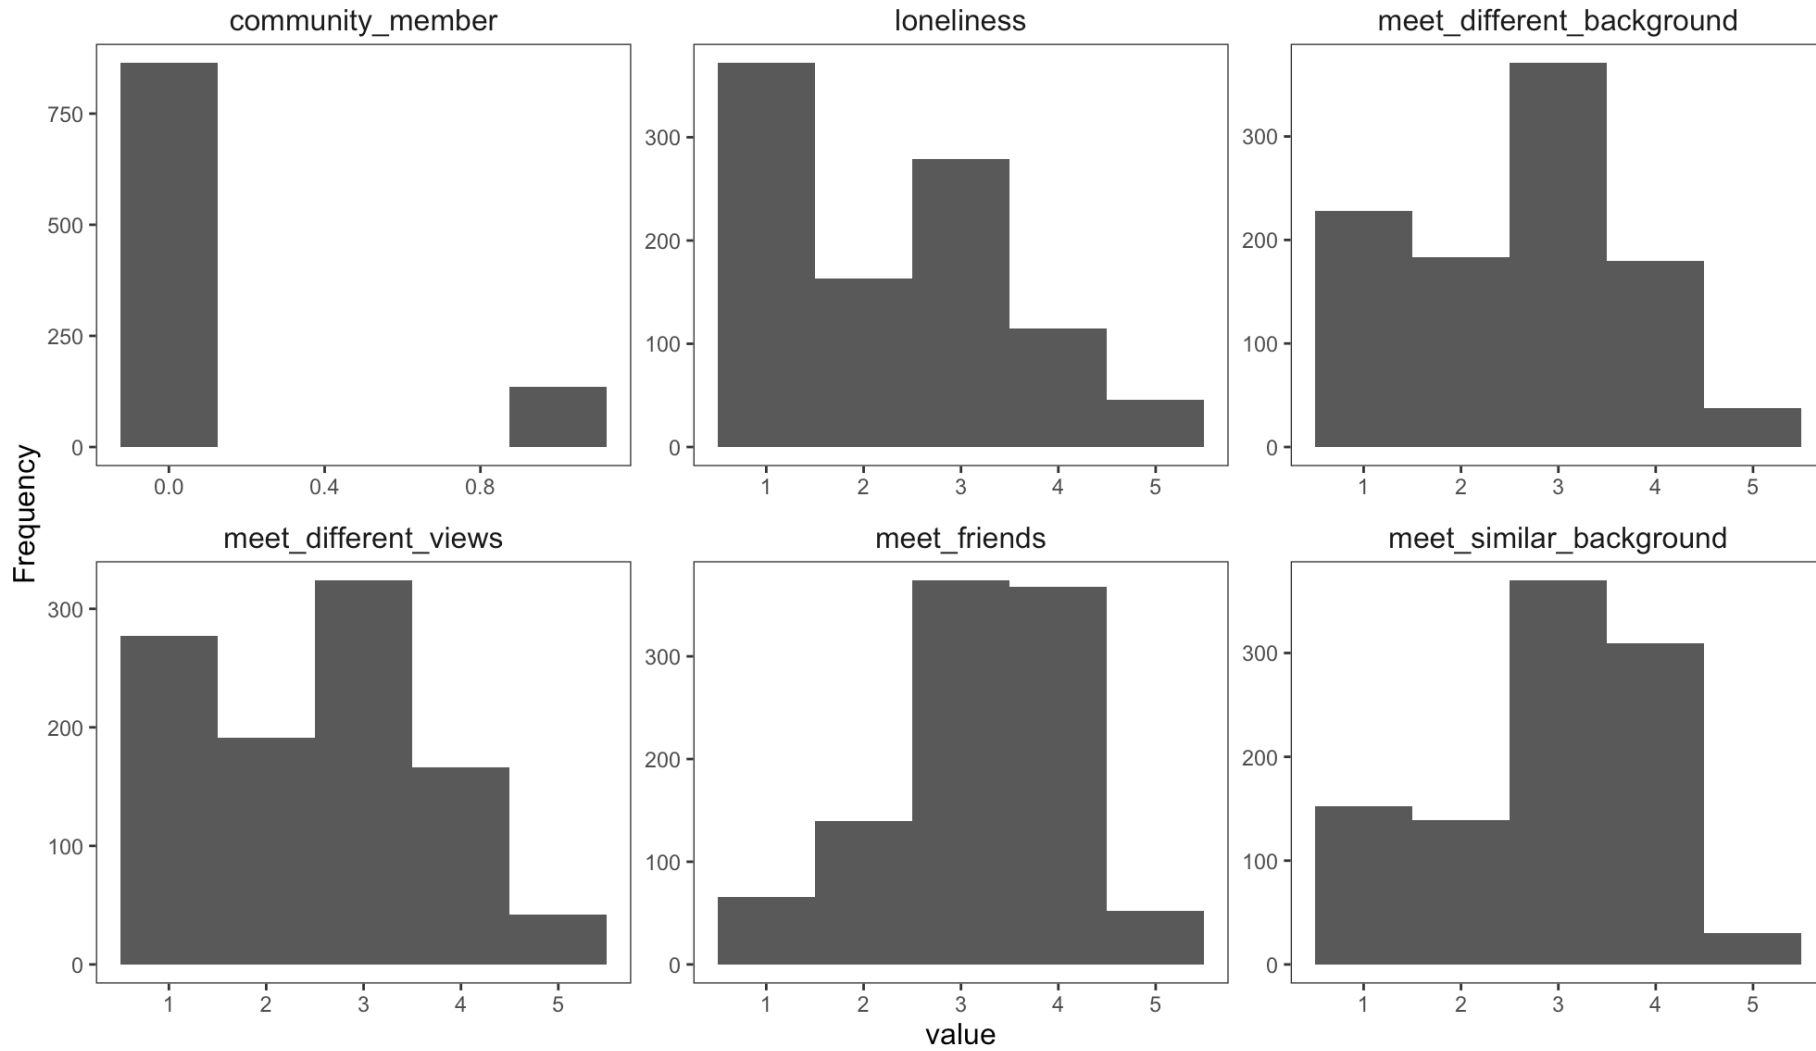

*Description variables*

### 2.1.2.2 United Kingdom

#### Independent variables UK

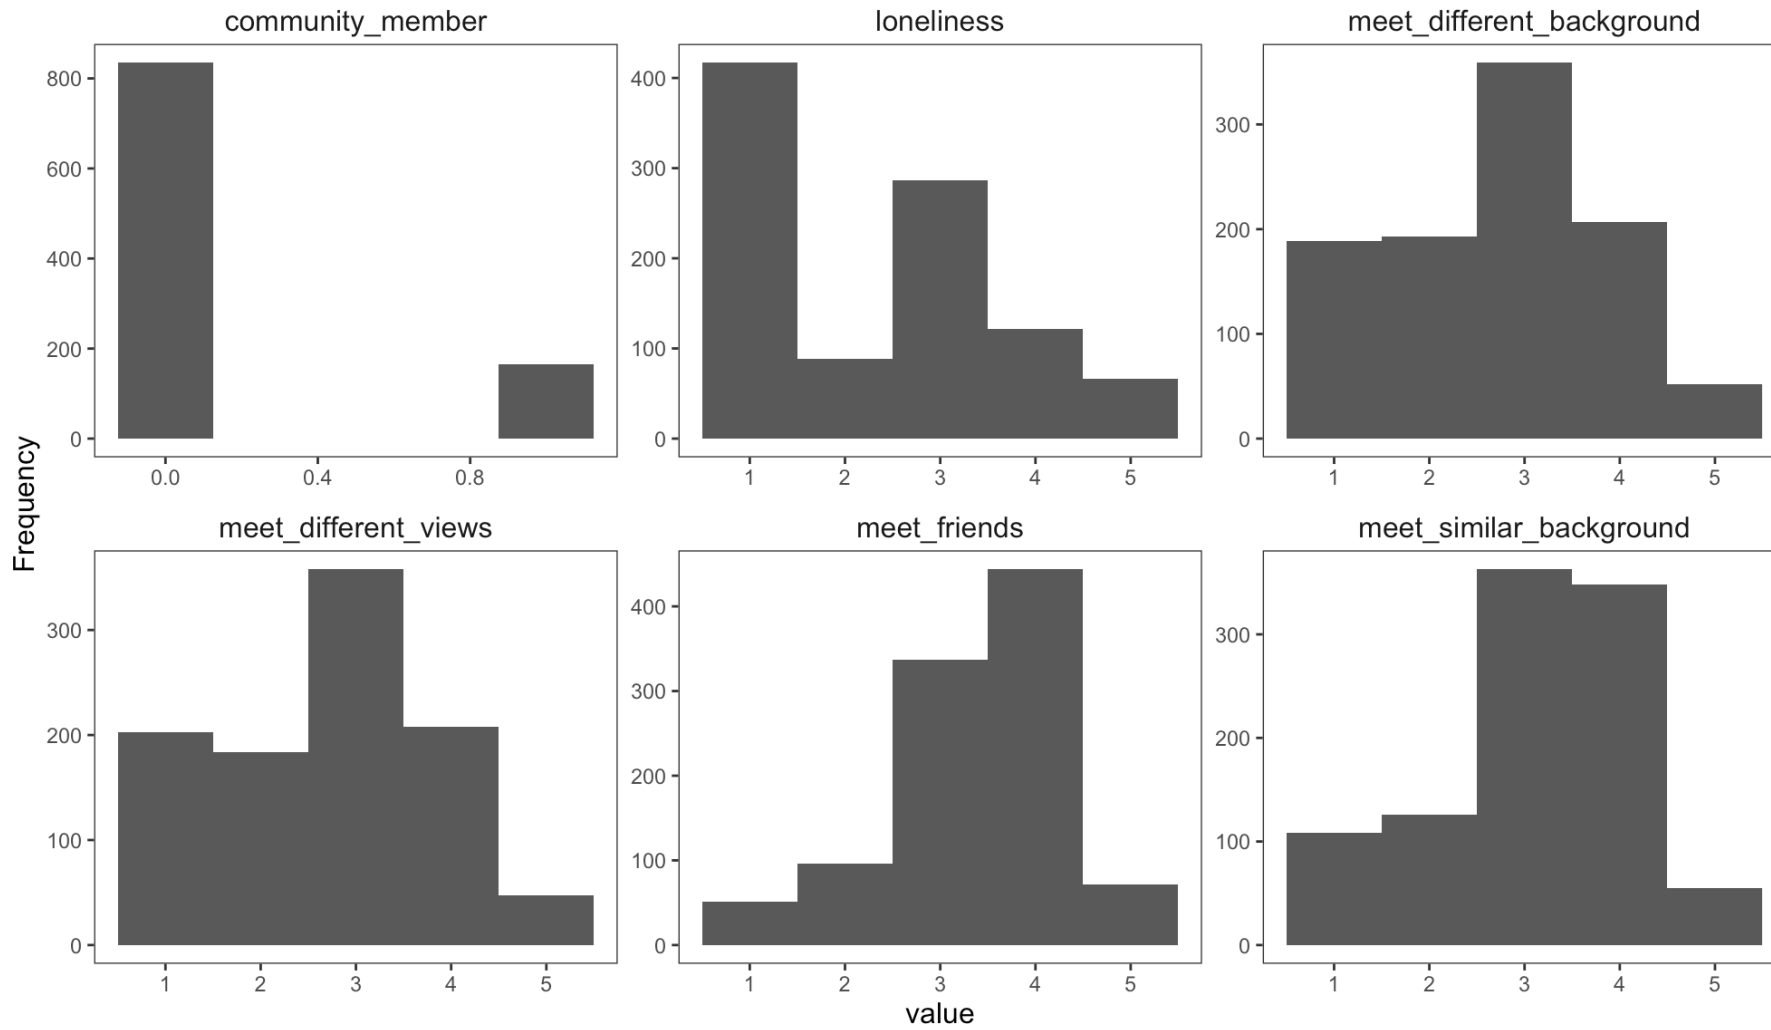

## 2.2 Dependent: affective polarisation

### 2.2.1 Descriptive tables

#### 2.2.1.1 Belgium

##### Polarisation statistics BE

| <i>vars</i>                                                 | <i>n</i> | <i>mean</i> | <i>sd</i> | <i>median</i> | <i>trimmed</i> | <i>mad</i> | <i>min</i> | <i>max</i> | <i>range</i> | <i>skew</i> | <i>kurtosis</i> | <i>se</i> |
|-------------------------------------------------------------|----------|-------------|-----------|---------------|----------------|------------|------------|------------|--------------|-------------|-----------------|-----------|
| Affective polarisation (most liked vs other parties)        | 941      | 3.54        | 2.14      | 3.50          | 3.46           | 2.22       | 0          | 8.57       | 8.57         | 0.29        | -0.41           | 0.07      |
| Affective polarisation (spread between all parties)         | 941      | 1.79        | 0.98      | 1.89          | 1.80           | 1.05       | 0          | 4.83       | 4.83         | -0.07       | -0.59           | 0.03      |
| Affective polarisation (vote choice party vs other parties) | 699      | 4.01        | 2.03      | 3.86          | 3.94           | 1.94       | 0          | 8.57       | 8.57         | 0.29        | -0.37           | 0.08      |

#### 2.2.1.2 United Kingdom

##### Polarisation statistics UK

| <i>vars</i>                                                 | <i>n</i> | <i>mean</i> | <i>sd</i> | <i>median</i> | <i>trimmed</i> | <i>mad</i> | <i>min</i> | <i>max</i> | <i>range</i> | <i>skew</i> | <i>kurtosis</i> | <i>se</i> |
|-------------------------------------------------------------|----------|-------------|-----------|---------------|----------------|------------|------------|------------|--------------|-------------|-----------------|-----------|
| Affective polarisation (most liked vs other parties)        | 949      | 3.13        | 1.96      | 3.00          | 3.05           | 1.78       | 0          | 8          | 8            | 0.35        | -0.36           | 0.06      |
| Affective polarisation (spread between all parties)         | 949      | 1.81        | 1.00      | 1.92          | 1.82           | 1.07       | 0          | 5          | 5            | -0.04       | -0.45           | 0.03      |
| Affective polarisation (vote choice party vs other parties) | 681      | 3.60        | 1.85      | 3.40          | 3.52           | 1.78       | 0          | 8          | 8            | 0.32        | -0.29           | 0.07      |

## 2.2.2 Histograms

### 2.2.2.1 Belgium

#### Polarisation variables Belgium

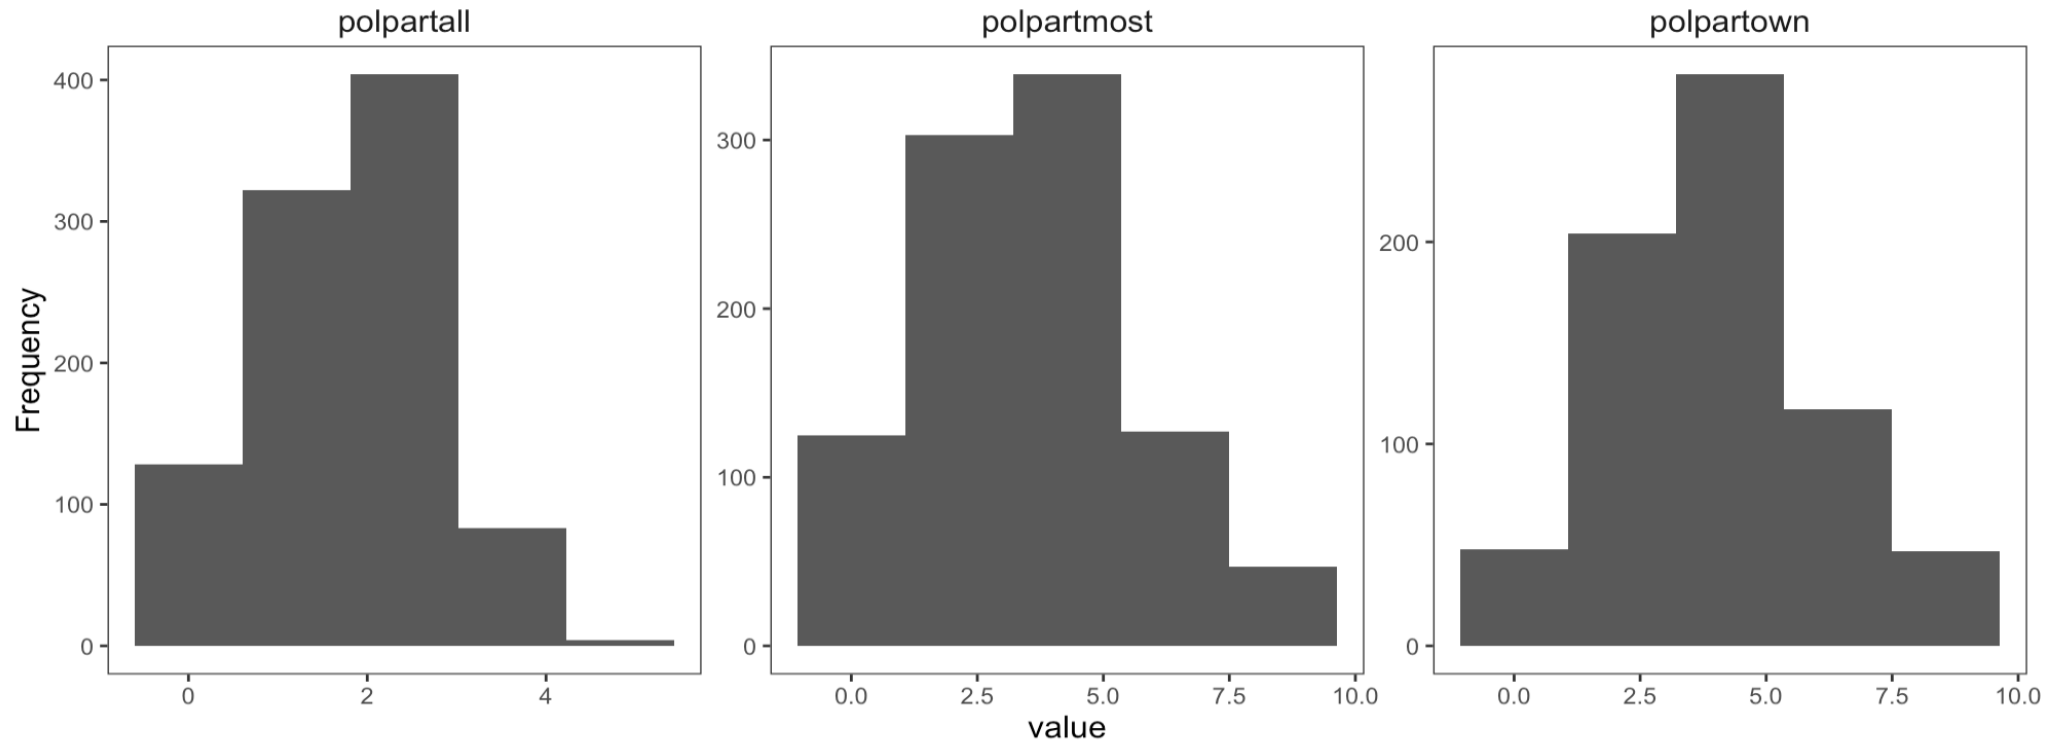

### 2.2.2.2 United Kingdom

#### Polarisation variables UK

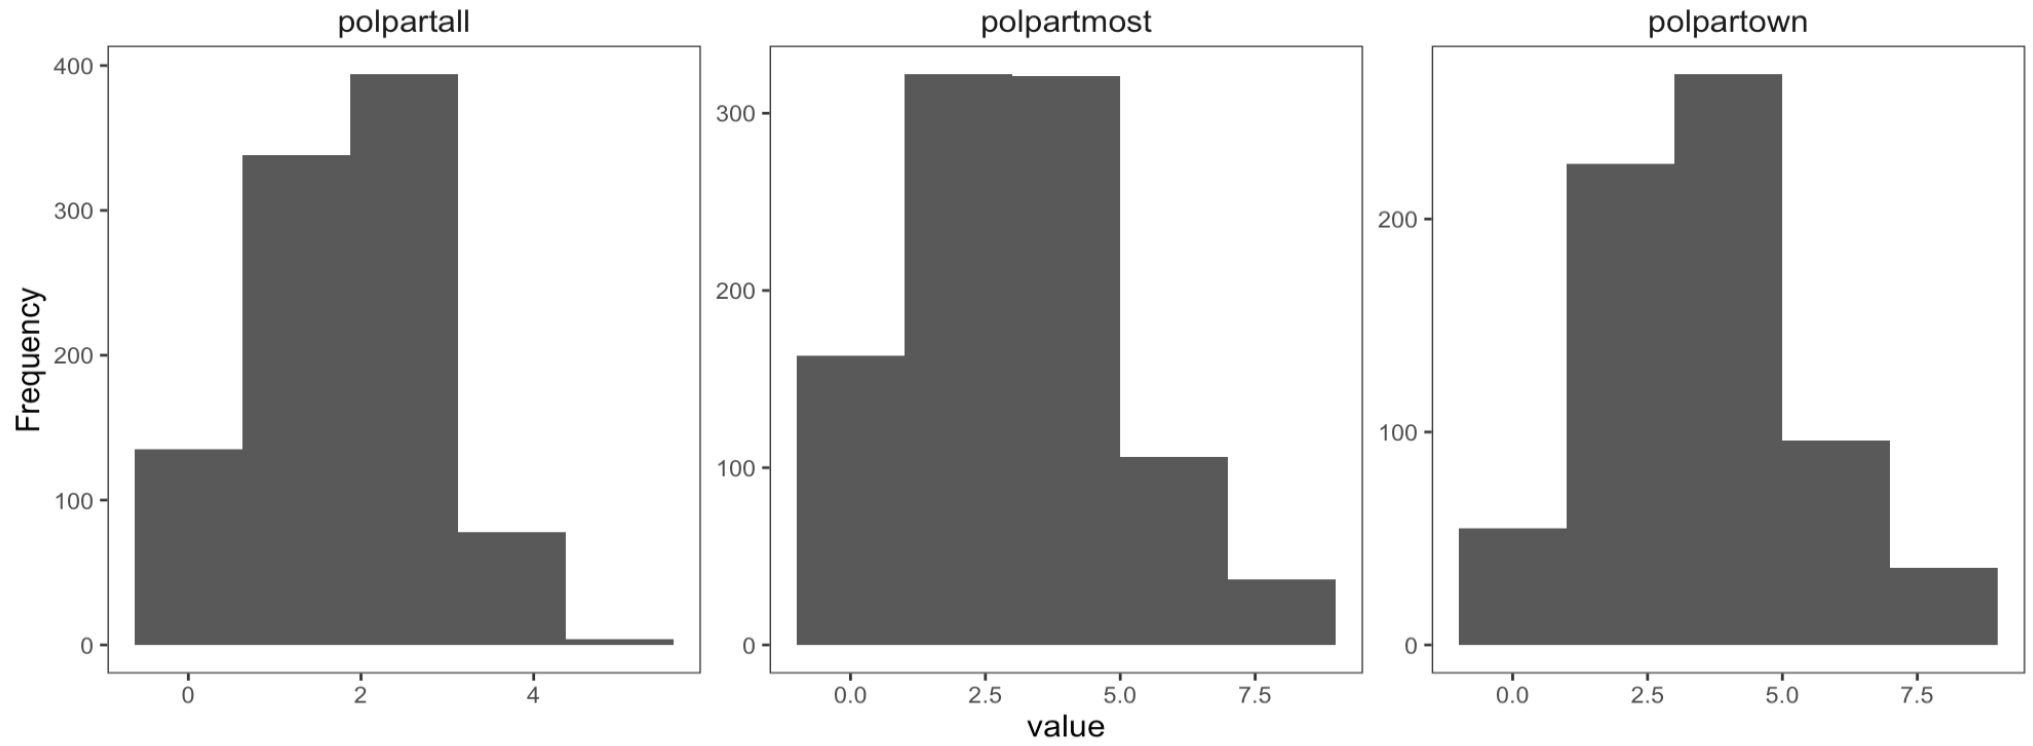

## 2.3 Control variables

### 2.3.1 Operationalisation

#### 2.3.1.1 *Political interest*

This was operationalized by asking “How interested are you in politics?”, ranging from 0 (“Not at all interested”) to 10 (“Very interested”).

#### 2.3.1.2 *Age*

This was directly asked as “How old are you”.

#### 2.3.1.3 *Gender*

This was asked as “What is your gender?”, with the options “male”, “female”, “non-binary”, “prefer not to say” and “other, please specify”. It was recoded to a binary variable of “Male” and “Female”, deleting the other categories as there were only 7 respondents in the other categories combined.

#### 2.3.1.4 *Education level*

For education, I asked “What is your highest obtained level of education?” with the following options:

- 1 – Primary education
- 2 – Secondary/further education
- 3 – Higher education
- 4 – No education
- 5 – Other, please specify...
- 98 – Prefer not to say
- 99 – Don’t know

This was then recoded to a binary variable with “Higher” (3) versus all other categories.

## 2.3.2 Descriptives

### 2.3.2.1 Belgium

#### Descriptive statistics Belgium

| <i>vars</i>        | <i>n</i> | <i>mean</i> | <i>sd</i> | <i>median</i> | <i>trimmed</i> | <i>mad</i> | <i>min</i> | <i>max</i> | <i>range</i> | <i>skew</i> | <i>kurtosis</i> | <i>se</i> |
|--------------------|----------|-------------|-----------|---------------|----------------|------------|------------|------------|--------------|-------------|-----------------|-----------|
| Political interest | 987      | 5.28        | 3.02      | 6             | 5.40           | 2.97       | 0          | 10         | 10           | -0.39       | -0.94           | 0.10      |
| Age                | 1000     | 49.22       | 17.96     | 49            | 49.15          | 22.24      | 18         | 95         | 77           | 0.04        | -1.07           | 0.57      |

| <i>vars</i>         | <i>n</i> | <i>%</i> |
|---------------------|----------|----------|
| Gender              | 994      | 100%     |
| <i>Male</i>         | 508      | 51%      |
| <i>Female</i>       | 486      | 49%      |
| Education           | 991      | 100%     |
| <i>No education</i> | 18       | 2%       |
| <i>Primary</i>      | 36       | 4%       |
| <i>Secondary</i>    | 426      | 43%      |
| <i>Higher</i>       | 511      | 51%      |

### 2.3.2.2 United Kingdom

#### Descriptive statistics UK

| <i>vars</i>        | <i>n</i> | <i>mean</i> | <i>sd</i> | <i>median</i> | <i>trimmed</i> | <i>mad</i> | <i>min</i> | <i>max</i> | <i>range</i> | <i>skew</i> | <i>kurtosis</i> | <i>se</i> |
|--------------------|----------|-------------|-----------|---------------|----------------|------------|------------|------------|--------------|-------------|-----------------|-----------|
| Political interest | 996      | 5.49        | 3.14      | 6             | 5.62           | 2.97       | 0          | 10         | 10           | -0.33       | -1.04           | 0.10      |
| Age                | 1000     | 48.53       | 18.07     | 48            | 48.26          | 22.24      | 18         | 90         | 72           | 0.12        | -1.08           | 0.57      |

| <i>vars</i>         | <i>n</i> | <i>%</i> |
|---------------------|----------|----------|
| Gender              | 997      | 100%     |
| <i>Male</i>         | 488      | 49%      |
| <i>Female</i>       | 509      | 51%      |
| Education           | 994      | 100%     |
| <i>No education</i> | 27       | 3%       |
| <i>Primary</i>      | 23       | 2%       |
| <i>Secondary</i>    | 397      | 40%      |
| <i>Higher</i>       | 547      | 55%      |

### 3 Multivariate description

#### 3.1 Correlation plots

##### 3.1.1 Belgium

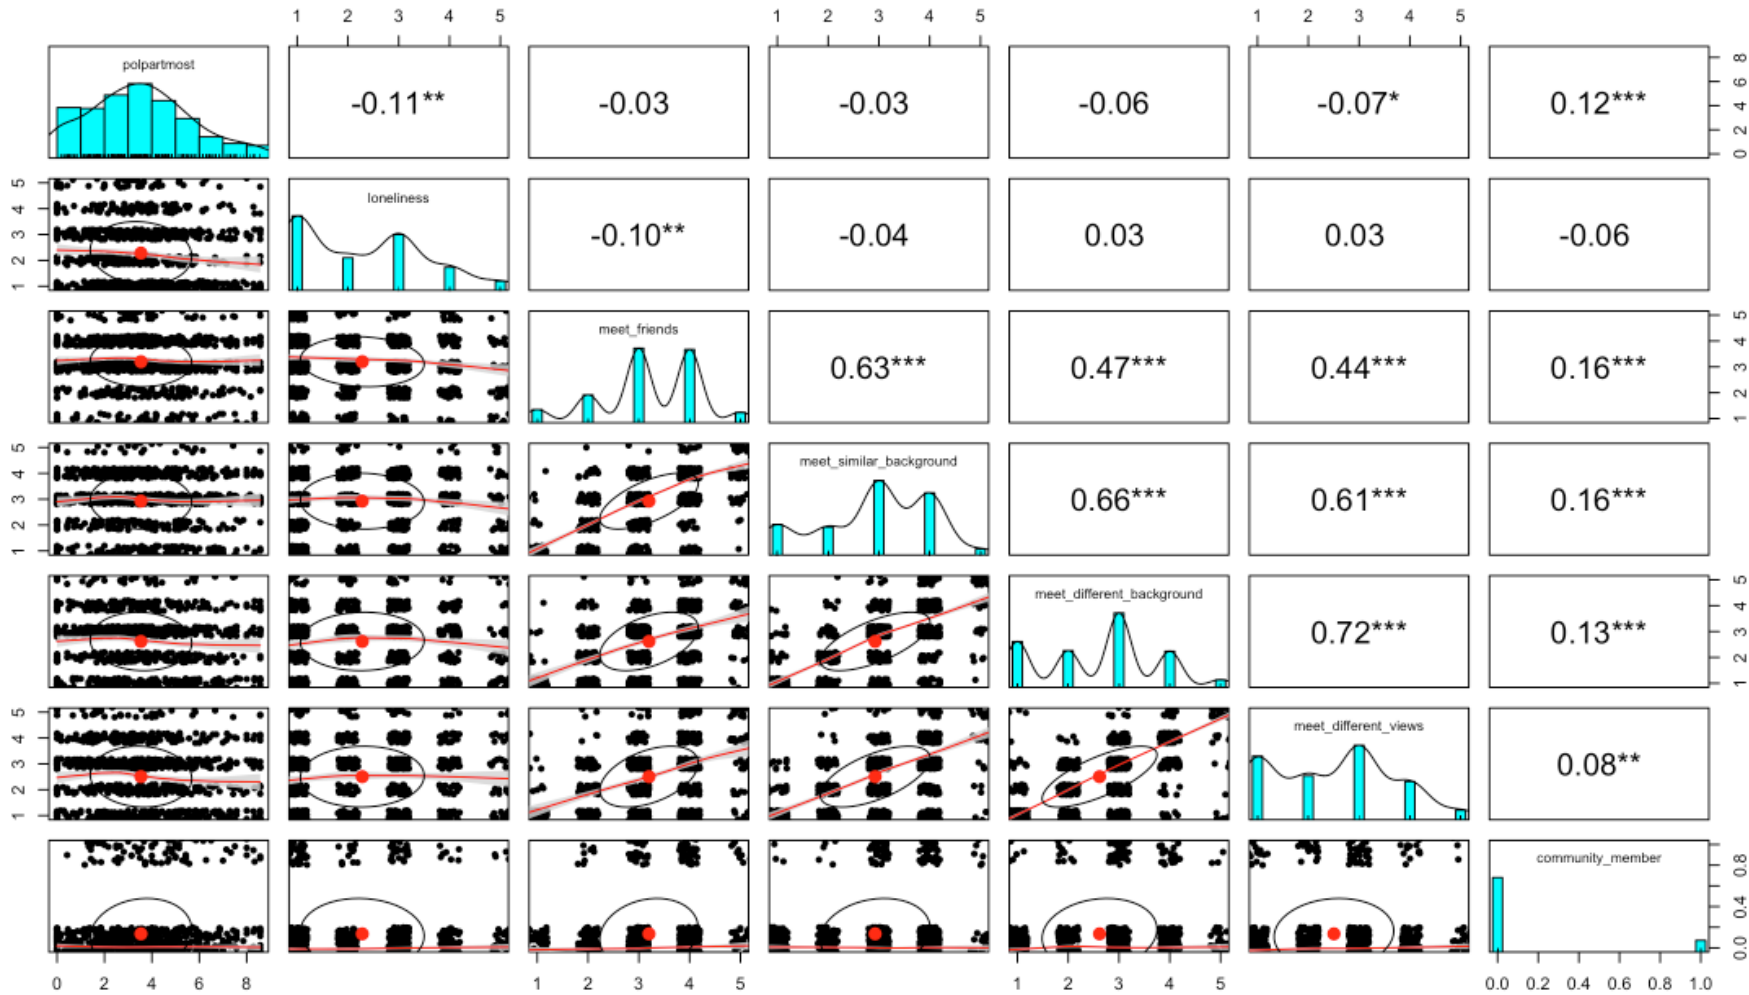

### 3.1.2 United Kingdom

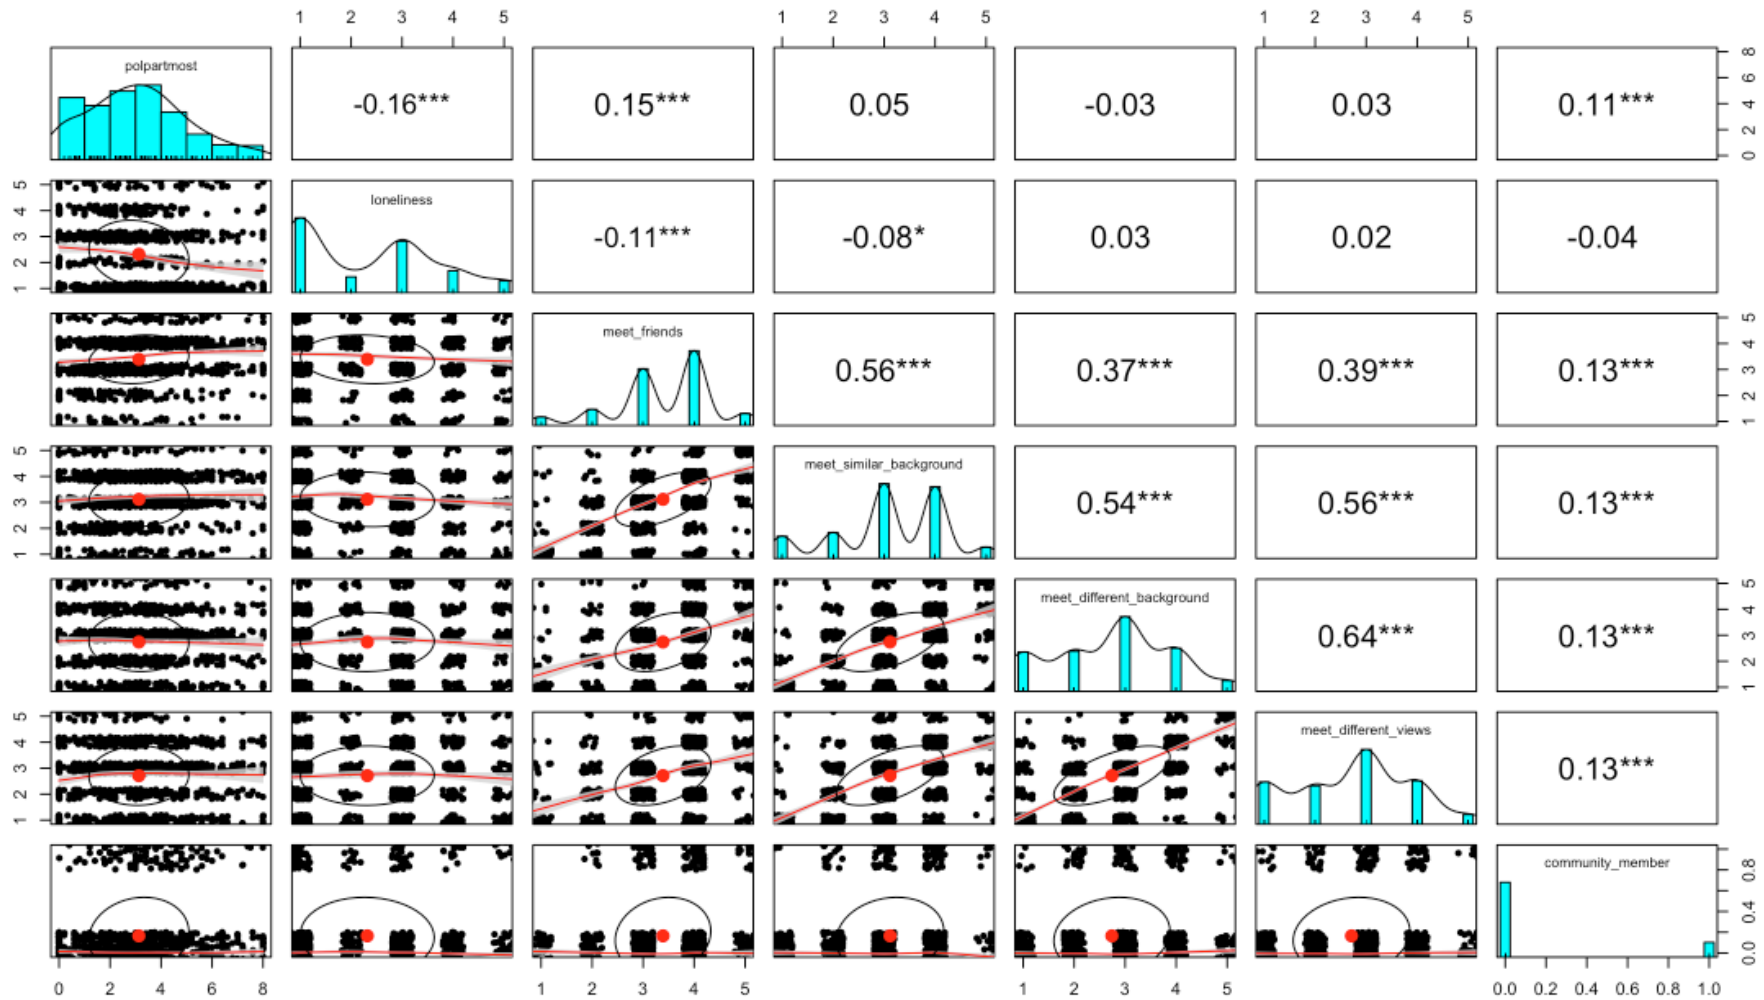

## 4 Model information

### 4.1 Model 1 (degree of relations)

#### 4.1.1 Model table (main)

##### Affective polarisation between most liked party and all others

| <i>Predictors</i>                        | <b>Belgium</b><br><i>std. Beta</i> | <b>Belgium</b><br><i>std. Beta</i> | <b>UK</b><br><i>std. Beta</i> | <b>UK</b><br><i>std. Beta</i> | <b>Belgium</b><br><i>std. Beta</i> | <b>Belgium</b><br><i>std. Beta</i> | <b>UK</b><br><i>std. Beta</i> | <b>UK</b><br><i>std. Beta</i> |
|------------------------------------------|------------------------------------|------------------------------------|-------------------------------|-------------------------------|------------------------------------|------------------------------------|-------------------------------|-------------------------------|
| (Intercept)                              | -0.00<br>(0.03)                    | -0.15 **<br>(0.05)                 | 0.00<br>(0.03)                | -0.05<br>(0.05)               | 0.00<br>(0.03)                     | -0.14 **<br>(0.05)                 | -0.00<br>(0.03)               | -0.04<br>(0.05)               |
| Meet network                             | -0.03<br>(0.03)                    | -0.01<br>(0.03)                    | 0.15 ***<br>(0.03)            | 0.11 ***<br>(0.03)            |                                    |                                    |                               |                               |
| Loneliness                               |                                    |                                    |                               |                               | -0.11 **<br>(0.03)                 | -0.05<br>(0.03)                    | -0.16 ***<br>(0.03)           | -0.08 *<br>(0.03)             |
| Political interest                       |                                    | 0.08 *<br>(0.03)                   |                               | 0.13 ***<br>(0.03)            |                                    | 0.08 *<br>(0.03)                   |                               | 0.14 ***<br>(0.03)            |
| Age                                      |                                    | 0.22 ***<br>(0.03)                 |                               | 0.24 ***<br>(0.03)            |                                    | 0.22 ***<br>(0.03)                 |                               | 0.22 ***<br>(0.03)            |
| Gender: male                             |                                    | 0.18 **<br>(0.07)                  |                               | 0.15 *<br>(0.06)              |                                    | 0.15 *<br>(0.07)                   |                               | 0.14 *<br>(0.06)              |
| Education: no education                  |                                    | 0.14 *<br>(0.06)                   |                               | -0.05<br>(0.06)               |                                    | 0.14 *<br>(0.06)                   |                               | -0.07<br>(0.06)               |
| Observations                             | 941                                | 922                                | 949                           | 939                           | 921                                | 903                                | 934                           | 924                           |
| R <sup>2</sup> / R <sup>2</sup> adjusted | 0.001 / -0.000                     | 0.087 / 0.082                      | 0.021 / 0.020                 | 0.117 / 0.113                 | 0.011 / 0.010                      | 0.091 / 0.086                      | 0.027 / 0.026                 | 0.112 / 0.107                 |

\*  $p < 0.05$  \*\*  $p < 0.01$  \*\*\*  $p < 0.001$

#### 4.1.2 Model tables (robustness checks)

##### Affective polarisation between all parties

|                                          | Belgium          | Belgium            | UK                 | UK                 | Belgium            | Belgium            | UK                  | UK                 |
|------------------------------------------|------------------|--------------------|--------------------|--------------------|--------------------|--------------------|---------------------|--------------------|
| <i>Predictors</i>                        | <i>std. Beta</i> | <i>std. Beta</i>   | <i>std. Beta</i>   | <i>std. Beta</i>   | <i>std. Beta</i>   | <i>std. Beta</i>   | <i>std. Beta</i>    | <i>std. Beta</i>   |
| (Intercept)                              | -0.00<br>(0.03)  | -0.16 **<br>(0.05) | 0.00<br>(0.03)     | 0.02<br>(0.05)     | -0.00<br>(0.03)    | -0.15 **<br>(0.05) | 0.00<br>(0.03)      | 0.03<br>(0.05)     |
| Meet network                             | 0.01<br>(0.03)   | 0.02<br>(0.03)     | 0.15 ***<br>(0.03) | 0.10 **<br>(0.03)  |                    |                    |                     |                    |
| Loneliness                               |                  |                    |                    |                    | -0.10 **<br>(0.03) | -0.04<br>(0.03)    | -0.15 ***<br>(0.03) | -0.09 *<br>(0.03)  |
| Political interest                       |                  | 0.12 ***<br>(0.03) |                    | 0.16 ***<br>(0.03) |                    | 0.12 ***<br>(0.03) |                     | 0.18 ***<br>(0.03) |
| Age                                      |                  | 0.17 ***<br>(0.03) |                    | 0.18 ***<br>(0.03) |                    | 0.16 ***<br>(0.03) |                     | 0.16 ***<br>(0.03) |
| Gender: male                             |                  | 0.23 ***<br>(0.07) |                    | 0.09<br>(0.06)     |                    | 0.21 **<br>(0.07)  |                     | 0.08<br>(0.06)     |
| Education: no education                  |                  | 0.10<br>(0.06)     |                    | -0.14 *<br>(0.06)  |                    | 0.10<br>(0.06)     |                     | -0.15 *<br>(0.06)  |
| Observations                             | 941              | 922                | 949                | 939                | 921                | 903                | 934                 | 924                |
| R <sup>2</sup> / R <sup>2</sup> adjusted | 0.000 / -0.001   | 0.085 / 0.080      | 0.021 / 0.020      | 0.096 / 0.091      | 0.009 / 0.008      | 0.084 / 0.079      | 0.022 / 0.021       | 0.098 / 0.093      |

\*  $p < 0.05$  \*\*  $p < 0.01$  \*\*\*  $p < 0.001$

**Affective polarisation between vote choice party and all other parties**

| <i>Predictors</i>                        | <b>Belgium</b><br><i>std. Beta</i> | <b>Belgium</b><br><i>std. Beta</i> | <b>UK</b><br><i>std. Beta</i> | <b>UK</b><br><i>std. Beta</i> | <b>Belgium</b><br><i>std. Beta</i> | <b>Belgium</b><br><i>std. Beta</i> | <b>UK</b><br><i>std. Beta</i> | <b>UK</b><br><i>std. Beta</i> |
|------------------------------------------|------------------------------------|------------------------------------|-------------------------------|-------------------------------|------------------------------------|------------------------------------|-------------------------------|-------------------------------|
| (Intercept)                              | -0.00<br>(0.04)                    | -0.19 **<br>(0.06)                 | -0.00<br>(0.04)               | -0.07<br>(0.06)               | -0.00<br>(0.04)                    | -0.17 **<br>(0.06)                 | 0.00<br>(0.04)                | -0.06<br>(0.06)               |
| Meet network                             | -0.03<br>(0.04)                    | 0.01<br>(0.04)                     | 0.12 **<br>(0.04)             | 0.11 **<br>(0.04)             |                                    |                                    |                               |                               |
| Loneliness                               |                                    |                                    |                               |                               | -0.15 ***<br>(0.04)                | -0.10 **<br>(0.04)                 | -0.20 ***<br>(0.04)           | -0.08 *<br>(0.04)             |
| Political interest                       |                                    | -0.02<br>(0.04)                    |                               | 0.02<br>(0.04)                |                                    | -0.02<br>(0.04)                    |                               | 0.03<br>(0.04)                |
| Age                                      |                                    | 0.25 ***<br>(0.04)                 |                               | 0.35 ***<br>(0.04)            |                                    | 0.23 ***<br>(0.04)                 |                               | 0.32 ***<br>(0.04)            |
| Gender: male                             |                                    | 0.20 **<br>(0.08)                  |                               | 0.12<br>(0.07)                |                                    | 0.17 *<br>(0.08)                   |                               | 0.12<br>(0.07)                |
| Education: no education                  |                                    | 0.17 *<br>(0.07)                   |                               | 0.00<br>(0.07)                |                                    | 0.17 *<br>(0.07)                   |                               | -0.01<br>(0.07)               |
| Observations                             | 699                                | 684                                | 681                           | 674                           | 688                                | 674                                | 672                           | 665                           |
| R <sup>2</sup> / R <sup>2</sup> adjusted | 0.001 / -0.000                     | 0.089 / 0.082                      | 0.014 / 0.013                 | 0.149 / 0.143                 | 0.023 / 0.022                      | 0.098 / 0.091                      | 0.042 / 0.040                 | 0.142 / 0.136                 |

\*  $p < 0.05$  \*\*  $p < 0.01$  \*\*\*  $p < 0.001$

## 4.2 Model 2 (kind of relations)

### 4.2.1 Model table (main)

#### Affective polarisation between most liked party and all others

| <i>Predictors</i>                        | Belgium            | Belgium            | UK                 | UK                 | Belgium            | Belgium            | UK                 | UK                 | Belgium          | Belgium            | UK                 | UK                 |
|------------------------------------------|--------------------|--------------------|--------------------|--------------------|--------------------|--------------------|--------------------|--------------------|------------------|--------------------|--------------------|--------------------|
|                                          | <i>std. Beta</i>   | <i>std. Beta</i> | <i>std. Beta</i>   | <i>std. Beta</i>   | <i>std. Beta</i>   |
| (Intercept)                              | -0.00<br>(0.03)    | -0.15 **<br>(0.05) | 0.00<br>(0.03)     | -0.05<br>(0.05)    | -0.00<br>(0.03)    | -0.15 **<br>(0.05) | 0.00<br>(0.03)     | -0.05<br>(0.05)    | 0.00<br>(0.03)   | -0.16 **<br>(0.05) | 0.00<br>(0.03)     | -0.05<br>(0.05)    |
| Community                                | 0.13 ***<br>(0.03) | 0.09 **<br>(0.03)  | 0.09 **<br>(0.03)  | 0.03<br>(0.03)     |                    |                    |                    |                    |                  |                    |                    |                    |
| Bonding relations                        |                    |                    |                    |                    | -0.02<br>(0.04)    | -0.02<br>(0.04)    | -0.04<br>(0.04)    | -0.04<br>(0.04)    |                  |                    |                    |                    |
| Bridging relations                       |                    |                    |                    |                    |                    |                    |                    |                    | -0.06<br>(0.04)  | -0.07<br>(0.04)    | -0.10 **<br>(0.03) | -0.09 **<br>(0.03) |
| Meet network                             | -0.05<br>(0.03)    | -0.02<br>(0.03)    | 0.13 ***<br>(0.03) | 0.10 ***<br>(0.03) | -0.02<br>(0.04)    | 0.01<br>(0.04)     | 0.17 ***<br>(0.04) | 0.13 ***<br>(0.04) | -0.00<br>(0.04)  | 0.02<br>(0.04)     | 0.18 ***<br>(0.03) | 0.14 ***<br>(0.03) |
| Political interest                       |                    | 0.07 *<br>(0.03)   |                    | 0.13 ***<br>(0.03) |                    | 0.09 *<br>(0.03)   |                    | 0.13 ***<br>(0.03) |                  | 0.09 **<br>(0.03)  |                    | 0.14 ***<br>(0.03) |
| Age                                      |                    | 0.22 ***<br>(0.03) |                    | 0.24 ***<br>(0.03) |                    | 0.22 ***<br>(0.03) |                    | 0.24 ***<br>(0.03) |                  | 0.22 ***<br>(0.03) |                    | 0.23 ***<br>(0.03) |
| Gender: male                             |                    | 0.17 *<br>(0.07)   |                    | 0.14 *<br>(0.06)   |                    | 0.18 **<br>(0.07)  |                    | 0.15 *<br>(0.06)   |                  | 0.18 **<br>(0.07)  |                    | 0.16 *<br>(0.06)   |
| Education: no education                  |                    | 0.15 *<br>(0.06)   |                    | -0.05<br>(0.06)    |                    | 0.14 *<br>(0.06)   |                    | -0.05<br>(0.06)    |                  | 0.14 *<br>(0.06)   |                    | -0.06<br>(0.06)    |
| Observations                             | 941                | 922                | 949                | 939                | 941                | 922                | 949                | 939                | 941              | 922                | 949                | 939                |
| R <sup>2</sup> / R <sup>2</sup> adjusted | 0.016 /<br>0.014   | 0.095 /<br>0.089   | 0.029 /<br>0.027   | 0.118 /<br>0.112   | 0.001 / -<br>0.001 | 0.087 /<br>0.081   | 0.022 /<br>0.020   | 0.118 /<br>0.113   | 0.003 /<br>0.001 | 0.090 /<br>0.084   | 0.030 /<br>0.028   | 0.125 /<br>0.119   |

\*  $p < 0.05$  \*\*  $p < 0.01$  \*\*\*  $p < 0.001$

## 4.2.2 Model tables (robustness checks)

### Affective polarisation between all parties

| <i>Predictors</i>                        | Belgium            | Belgium            | UK                 | UK                 | Belgium            | Belgium            | UK                 | UK                 | Belgium            | Belgium            | UK                 | UK                 |
|------------------------------------------|--------------------|--------------------|--------------------|--------------------|--------------------|--------------------|--------------------|--------------------|--------------------|--------------------|--------------------|--------------------|
|                                          | <i>std. Beta</i>   |
| (Intercept)                              | -0.00<br>(0.03)    | -0.16 **<br>(0.05) | 0.00<br>(0.03)     | 0.02<br>(0.05)     | -0.00<br>(0.03)    | -0.16 **<br>(0.05) | 0.00<br>(0.03)     | 0.02<br>(0.05)     | -0.00<br>(0.03)    | -0.16 **<br>(0.05) | -0.00<br>(0.03)    | 0.02<br>(0.05)     |
| Community                                | 0.12 ***<br>(0.03) | 0.08 *<br>(0.03)   | 0.11 ***<br>(0.03) | 0.04<br>(0.03)     |                    |                    |                    |                    |                    |                    |                    |                    |
| Bonding relations                        |                    |                    |                    |                    | 0.04<br>(0.04)     | 0.01<br>(0.04)     | -0.04<br>(0.04)    | -0.05<br>(0.04)    |                    |                    |                    |                    |
| Bridging relations                       |                    |                    |                    |                    |                    |                    |                    |                    | -0.01<br>(0.04)    | -0.04<br>(0.04)    | -0.09 **<br>(0.03) | -0.10 **<br>(0.03) |
| Meet network                             | -0.01<br>(0.03)    | 0.01<br>(0.03)     | 0.13 ***<br>(0.03) | 0.10 **<br>(0.03)  | -0.01<br>(0.04)    | 0.02<br>(0.04)     | 0.17 ***<br>(0.04) | 0.13 ***<br>(0.04) | 0.02<br>(0.04)     | 0.04<br>(0.04)     | 0.18 ***<br>(0.03) | 0.14 ***<br>(0.03) |
| Political interest                       |                    | 0.11 ***<br>(0.03) |                    | 0.15 ***<br>(0.03) |                    | 0.12 ***<br>(0.03) |                    | 0.17 ***<br>(0.03) |                    | 0.13 ***<br>(0.03) |                    | 0.17 ***<br>(0.03) |
| Age                                      |                    | 0.17 ***<br>(0.03) |                    | 0.16 ***<br>(0.03) |
| Gender: male                             |                    | 0.22 ***<br>(0.07) |                    | 0.08<br>(0.06)     |                    | 0.23 ***<br>(0.07) |                    | 0.09<br>(0.06)     |                    | 0.24 ***<br>(0.07) |                    | 0.10<br>(0.06)     |
| Education: no education                  |                    | 0.11<br>(0.06)     |                    | -0.13 *<br>(0.06)  |                    | 0.10<br>(0.06)     |                    | -0.14 *<br>(0.06)  |                    | 0.10<br>(0.06)     |                    | -0.15 *<br>(0.06)  |
| Observations                             | 941                | 922                | 949                | 939                | 941                | 922                | 949                | 939                | 941                | 922                | 949                | 939                |
| R <sup>2</sup> / R <sup>2</sup> adjusted | 0.014 /<br>0.012   | 0.091 /<br>0.085   | 0.033 /<br>0.031   | 0.098 /<br>0.092   | 0.001 / -<br>0.001 | 0.085 /<br>0.079   | 0.022 /<br>0.020   | 0.098 /<br>0.092   | 0.000 / -<br>0.002 | 0.086 /<br>0.080   | 0.028 /<br>0.026   | 0.105 /<br>0.099   |

\*  $p < 0.05$  \*\*  $p < 0.01$  \*\*\*  $p < 0.001$

**Affective polarisation between vote choice party and all others**

|                                          | Belgium           | Belgium            | UK                | UK                 | Belgium          | Belgium            | UK                 | UK                 | Belgium            | Belgium            | UK                  | UK                  |
|------------------------------------------|-------------------|--------------------|-------------------|--------------------|------------------|--------------------|--------------------|--------------------|--------------------|--------------------|---------------------|---------------------|
| <i>Predictors</i>                        | <i>std. Beta</i>  | <i>std. Beta</i>   | <i>std. Beta</i>  | <i>std. Beta</i>   | <i>std. Beta</i> | <i>std. Beta</i>   | <i>std. Beta</i>   | <i>std. Beta</i>   | <i>std. Beta</i>   | <i>std. Beta</i>   | <i>std. Beta</i>    | <i>std. Beta</i>    |
| (Intercept)                              | -0.00<br>(0.04)   | -0.19 **<br>(0.06) | -0.00<br>(0.04)   | -0.06<br>(0.06)    | -0.00<br>(0.04)  | -0.19 **<br>(0.06) | -0.00<br>(0.04)    | -0.07<br>(0.06)    | -0.00<br>(0.04)    | -0.19 **<br>(0.06) | -0.00<br>(0.04)     | -0.08<br>(0.06)     |
| Community                                | 0.11 **<br>(0.04) | 0.08 *<br>(0.04)   | 0.03<br>(0.04)    | -0.02<br>(0.04)    |                  |                    |                    |                    |                    |                    |                     |                     |
| Bonding relations                        |                   |                    |                   |                    | -0.09<br>(0.05)  | -0.06<br>(0.05)    | -0.07<br>(0.05)    | -0.05<br>(0.04)    |                    |                    |                     |                     |
| Bridging relations                       |                   |                    |                   |                    |                  |                    |                    |                    | -0.11 **<br>(0.04) | -0.09 *<br>(0.04)  | -0.19 ***<br>(0.04) | -0.14 ***<br>(0.04) |
| Meet network                             | -0.05<br>(0.04)   | -0.00<br>(0.04)    | 0.12 **<br>(0.04) | 0.11 **<br>(0.04)  | 0.02<br>(0.05)   | 0.05<br>(0.05)     | 0.16 ***<br>(0.05) | 0.14 **<br>(0.04)  | 0.02<br>(0.04)     | 0.05<br>(0.04)     | 0.19 ***<br>(0.04)  | 0.16 ***<br>(0.04)  |
| Political interest                       |                   | -0.04<br>(0.04)    |                   | 0.02<br>(0.04)     |                  | -0.02<br>(0.04)    |                    | 0.03<br>(0.04)     |                    | -0.01<br>(0.04)    |                     | 0.04<br>(0.04)      |
| Age                                      |                   | 0.24 ***<br>(0.04) |                   | 0.35 ***<br>(0.04) |                  | 0.25 ***<br>(0.04) |                    | 0.35 ***<br>(0.04) |                    | 0.24 ***<br>(0.04) |                     | 0.33 ***<br>(0.04)  |
| Gender: male                             |                   | 0.19 *<br>(0.08)   |                   | 0.13<br>(0.07)     |                  | 0.21 **<br>(0.08)  |                    | 0.12<br>(0.07)     |                    | 0.21 **<br>(0.08)  |                     | 0.14 *<br>(0.07)    |
| Education: no education                  |                   | 0.18 *<br>(0.07)   |                   | -0.00<br>(0.07)    |                  | 0.17 *<br>(0.07)   |                    | 0.00<br>(0.07)     |                    | 0.16 *<br>(0.07)   |                     | 0.00<br>(0.07)      |
| Observations                             | 699               | 684                | 681               | 674                | 699              | 684                | 681                | 674                | 699                | 684                | 681                 | 674                 |
| R <sup>2</sup> / R <sup>2</sup> adjusted | 0.013 /<br>0.010  | 0.095 /<br>0.087   | 0.015 /<br>0.012  | 0.149 /<br>0.142   | 0.006 /<br>0.003 | 0.091 /<br>0.083   | 0.018 /<br>0.015   | 0.151 /<br>0.143   | 0.011 /<br>0.008   | 0.095 /<br>0.087   | 0.047 /<br>0.044    | 0.166 /<br>0.159    |

\*  $p < 0.05$  \*\*  $p < 0.01$  \*\*\*  $p < 0.001$

## 4.3 Model 3 (interaction effects)

### 4.3.1 Model table (main)

#### Affective polarisation between most liked party and all others

| <i>Predictors</i>                        | <b>Belgium</b>   | <b>Belgium</b>     | <b>UK</b>          | <b>UK</b>          | <b>Belgium</b>   | <b>Belgium</b>     | <b>UK</b>          | <b>UK</b>          |
|------------------------------------------|------------------|--------------------|--------------------|--------------------|------------------|--------------------|--------------------|--------------------|
|                                          | <i>std. Beta</i> | <i>std. Beta</i>   | <i>std. Beta</i>   | <i>std. Beta</i>   | <i>std. Beta</i> | <i>std. Beta</i>   | <i>std. Beta</i>   | <i>std. Beta</i>   |
| (Intercept)                              | -0.01<br>(0.04)  | -0.16 **<br>(0.06) | 0.01<br>(0.04)     | -0.04<br>(0.05)    | -0.01<br>(0.04)  | -0.16 **<br>(0.05) | 0.01<br>(0.03)     | -0.05<br>(0.05)    |
| Meet network                             | -0.02<br>(0.04)  | 0.01<br>(0.04)     | 0.16 ***<br>(0.04) | 0.12 **<br>(0.04)  | 0.01<br>(0.04)   | 0.03<br>(0.04)     | 0.18 ***<br>(0.04) | 0.14 ***<br>(0.03) |
| Bonding relations                        | -0.02<br>(0.04)  | -0.02<br>(0.04)    | -0.04<br>(0.04)    | -0.04<br>(0.04)    |                  |                    |                    |                    |
| Meet network x bonding relations         | 0.01<br>(0.03)   | 0.01<br>(0.03)     | -0.02<br>(0.03)    | -0.02<br>(0.03)    |                  |                    |                    |                    |
| Bridging relations                       |                  |                    |                    |                    | -0.06<br>(0.04)  | -0.07<br>(0.04)    | -0.10 **<br>(0.03) | -0.09 **<br>(0.03) |
| Meet network x bridging relations        |                  |                    |                    |                    | 0.03<br>(0.03)   | 0.01<br>(0.03)     | -0.02<br>(0.03)    | -0.01<br>(0.03)    |
| Political interest                       |                  | 0.09 *<br>(0.03)   |                    | 0.13 ***<br>(0.03) |                  | 0.09 **<br>(0.03)  |                    | 0.14 ***<br>(0.03) |
| Age                                      |                  | 0.22 ***<br>(0.03) |                    | 0.24 ***<br>(0.03) |                  | 0.22 ***<br>(0.03) |                    | 0.23 ***<br>(0.03) |
| Gender: male                             |                  | 0.18 **<br>(0.07)  |                    | 0.15 *<br>(0.06)   |                  | 0.18 **<br>(0.07)  |                    | 0.16 *<br>(0.06)   |
| Education: no education                  |                  | 0.14 *<br>(0.06)   |                    | -0.05<br>(0.06)    |                  | 0.14 *<br>(0.06)   |                    | -0.06<br>(0.06)    |
| Observations                             | 941              | 922                | 949                | 939                | 941              | 922                | 949                | 939                |
| R <sup>2</sup> / R <sup>2</sup> adjusted | 0.001 / -0.002   | 0.087 / 0.080      | 0.023 / 0.020      | 0.119 / 0.112      | 0.004 / 0.001    | 0.091 / 0.084      | 0.031 / 0.028      | 0.125 / 0.118      |

\*  $p < 0.05$  \*\*  $p < 0.01$  \*\*\*  $p < 0.001$

### 4.3.2 Model tables (robustness checks)

#### Affective polarisation between all parties

| <i>Predictors</i>                        | <b>Belgium</b>   | <b>Belgium</b>     | <b>UK</b>          | <b>UK</b>          | <b>Belgium</b>   | <b>Belgium</b>     | <b>UK</b>          | <b>UK</b>          |
|------------------------------------------|------------------|--------------------|--------------------|--------------------|------------------|--------------------|--------------------|--------------------|
|                                          | <i>std. Beta</i> | <i>std. Beta</i>   | <i>std. Beta</i>   | <i>std. Beta</i>   | <i>std. Beta</i> | <i>std. Beta</i>   | <i>std. Beta</i>   | <i>std. Beta</i>   |
| (Intercept)                              | -0.00<br>(0.04)  | -0.16 **<br>(0.06) | 0.02<br>(0.04)     | 0.04<br>(0.05)     | 0.00<br>(0.04)   | -0.15 **<br>(0.06) | 0.01<br>(0.03)     | 0.02<br>(0.05)     |
| Meet network                             | -0.01<br>(0.04)  | 0.02<br>(0.04)     | 0.15 ***<br>(0.04) | 0.11 **<br>(0.04)  | 0.01<br>(0.04)   | 0.03<br>(0.04)     | 0.17 ***<br>(0.04) | 0.14 ***<br>(0.03) |
| Bonding relations                        | 0.04<br>(0.04)   | 0.01<br>(0.04)     | -0.04<br>(0.04)    | -0.05<br>(0.04)    |                  |                    |                    |                    |
| Meet network x bonding relations         | 0.00<br>(0.03)   | 0.00<br>(0.03)     | -0.04<br>(0.03)    | -0.04<br>(0.03)    |                  |                    |                    |                    |
| Bridging relations                       |                  |                    |                    |                    | -0.01<br>(0.04)  | -0.03<br>(0.04)    | -0.09 **<br>(0.03) | -0.10 **<br>(0.03) |
| Meet network x bridging relations        |                  |                    |                    |                    | -0.01<br>(0.03)  | -0.02<br>(0.03)    | -0.02<br>(0.03)    | -0.00<br>(0.03)    |
| Political interest                       |                  | 0.12 ***<br>(0.03) |                    | 0.17 ***<br>(0.03) |                  | 0.13 ***<br>(0.03) |                    | 0.17 ***<br>(0.03) |
| Age                                      |                  | 0.17 ***<br>(0.03) |                    | 0.17 ***<br>(0.03) |                  | 0.17 ***<br>(0.03) |                    | 0.16 ***<br>(0.03) |
| Gender: male                             |                  | 0.23 ***<br>(0.07) |                    | 0.09<br>(0.06)     |                  | 0.24 ***<br>(0.07) |                    | 0.10<br>(0.06)     |
| Education: no education                  |                  | 0.10<br>(0.06)     |                    | -0.13 *<br>(0.06)  |                  | 0.10<br>(0.06)     |                    | -0.15 *<br>(0.06)  |
| Observations                             | 941              | 922                | 949                | 939                | 941              | 922                | 949                | 939                |
| R <sup>2</sup> / R <sup>2</sup> adjusted | 0.001 / -0.002   | 0.085 / 0.078      | 0.024 / 0.021      | 0.100 / 0.093      | 0.000 / -0.003   | 0.086 / 0.079      | 0.029 / 0.026      | 0.105 / 0.098      |

\*  $p < 0.05$  \*\*  $p < 0.01$  \*\*\*  $p < 0.001$

**Affective polarisation between voted for party and all others**

|                                          | <b>Belgium</b>   | <b>Belgium</b>     | <b>UK</b>          | <b>UK</b>          | <b>Belgium</b>     | <b>Belgium</b>     | <b>UK</b>           | <b>UK</b>           |
|------------------------------------------|------------------|--------------------|--------------------|--------------------|--------------------|--------------------|---------------------|---------------------|
| <i>Predictors</i>                        | <i>std. Beta</i> | <i>std. Beta</i>   | <i>std. Beta</i>   | <i>std. Beta</i>   | <i>std. Beta</i>   | <i>std. Beta</i>   | <i>std. Beta</i>    | <i>std. Beta</i>    |
| (Intercept)                              | -0.04<br>(0.04)  | -0.22 **<br>(0.07) | -0.01<br>(0.04)    | -0.08<br>(0.06)    | -0.04<br>(0.04)    | -0.21 **<br>(0.07) | -0.01<br>(0.04)     | -0.08<br>(0.06)     |
| Meet network                             | 0.04<br>(0.05)   | 0.06<br>(0.05)     | 0.17 ***<br>(0.05) | 0.14 **<br>(0.04)  | 0.05<br>(0.04)     | 0.06<br>(0.04)     | 0.20 ***<br>(0.04)  | 0.16 ***<br>(0.04)  |
| Bonding relations                        | -0.09<br>(0.05)  | -0.06<br>(0.05)    | -0.07<br>(0.05)    | -0.05<br>(0.04)    |                    |                    |                     |                     |
| Meet network x bonding relations         | 0.07 *<br>(0.03) | 0.05<br>(0.03)     | 0.02<br>(0.03)     | 0.02<br>(0.03)     |                    |                    |                     |                     |
| Bridging relations                       |                  |                    |                    |                    | -0.13 **<br>(0.04) | -0.10 *<br>(0.04)  | -0.20 ***<br>(0.04) | -0.15 ***<br>(0.04) |
| Meet network x bridging relations        |                  |                    |                    |                    | 0.09 *<br>(0.04)   | 0.05<br>(0.03)     | 0.04<br>(0.03)      | 0.04<br>(0.03)      |
| Political interest                       |                  | -0.01<br>(0.04)    |                    | 0.03<br>(0.04)     |                    | -0.01<br>(0.04)    |                     | 0.04<br>(0.04)      |
| Age                                      |                  | 0.24 ***<br>(0.04) |                    | 0.35 ***<br>(0.04) |                    | 0.23 ***<br>(0.04) |                     | 0.33 ***<br>(0.04)  |
| Gender: male                             |                  | 0.21 **<br>(0.08)  |                    | 0.12<br>(0.07)     |                    | 0.21 **<br>(0.08)  |                     | 0.14<br>(0.07)      |
| Education: no education                  |                  | 0.16 *<br>(0.07)   |                    | -0.00<br>(0.07)    |                    | 0.16 *<br>(0.07)   |                     | -0.00<br>(0.07)     |
| Observations                             | 699              | 684                | 681                | 674                | 699                | 684                | 681                 | 674                 |
| R <sup>2</sup> / R <sup>2</sup> adjusted | 0.013 / 0.008    | 0.094 / 0.085      | 0.019 / 0.014      | 0.151 / 0.143      | 0.019 / 0.015      | 0.098 / 0.088      | 0.048 / 0.044       | 0.168 / 0.159       |

\*  $p < 0.05$  \*\*  $p < 0.01$  \*\*\*  $p < 0.001$
